# Supplementary material for: Selective capture and rapid identification of E. coli O157:H7 by carbon nanotube multilayer biosensors and microfluidic chip-based LAMP
Source: Royal Society of Chemistry journal article supplement (doi:10.1039/c7ra04583b), 2017-01-01
Supplement: c7ra04583b1.pdf [file c7ra04583b1.pdf]

Electronic Supplementary Material (ESI) for RSC advances.

This journal is © The Royal Society of Chemistry 2017

## Electronic Supplementary Information

### Selective Capture and Rapid Identification of *E. coli* O157:H7 by Carbon Nanotubes Multilayer Biosensors and Microfluidic chip- based LAMP

*Tianchan Li,<sup>a</sup> Fanjiao Zhu,<sup>a</sup> Wei Guo,<sup>a</sup> Hongxi Gu,<sup>a</sup> Jing Zhao,<sup>a</sup> Mei Yan,*

*<sup>\*ab</sup> Shaoqin Liu<sup>\*ab</sup>*

*a School of Life Science and Technology, State Key Laboratory of Urban Water Resource and Environment, Harbin*

*Institute of Technology, Harbin 150080, China*

*b Micro- and Nanotechnology Research Center, Harbin Institute of Technology, Harbin 150080, China*

*E-mail: yanmei@hit.edu.cn; shaoqinliu@hit.edu.cn*

**Part S1 Preparation, characterization and bacterial capture capability of the CNT multilayer biosensors**

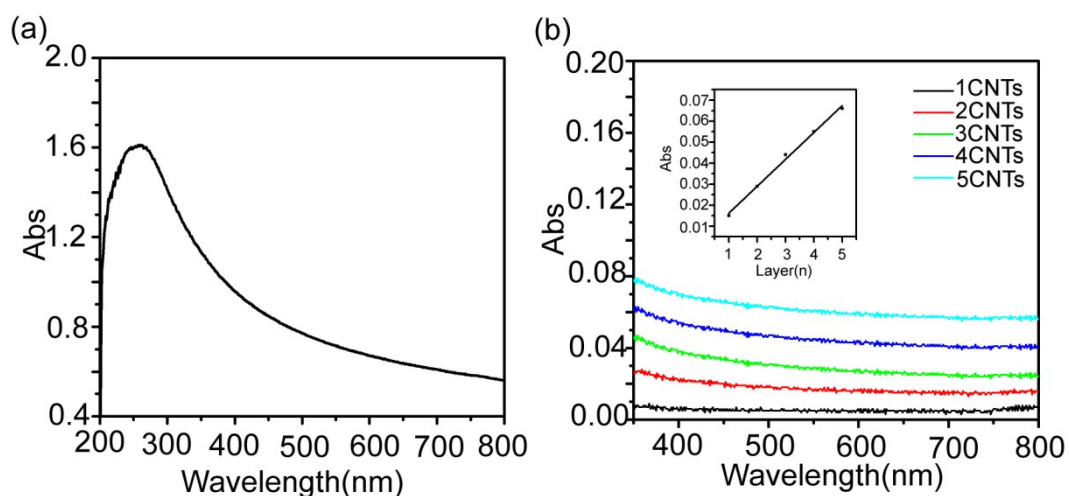

**Fig. S1** (a) Absorption spectra of MWCNTs. (b) UV-vis spectra of (MWCNT/PEI)<sub>n</sub> multilayers assembled onto ITO electrode surface. In the range of 350-800 nm, the absorbance is gradually increased with the number of bilayers *n*. The inset shows the linear relationship between the absorbance at 400 nm and the MWCNT/PEI bilayer numbers, demonstrating that the LBL assembly process is reproducible, uniform and stable.

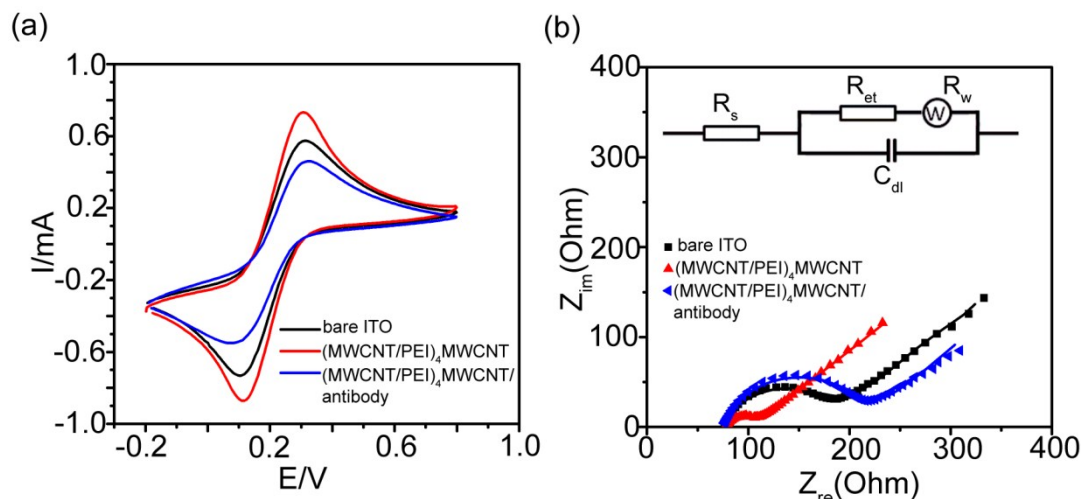

**Fig. S2** Cyclic voltammograms (a) and EIS spectra (b) of  $[\text{Fe}(\text{CN})_6]^{3-/4-}$  at bare ITO electrode (black curve), (MWCNT/PEI)<sub>4</sub>MWCNT multilayers-coated ITO electrode (red curve), and the anti-*E. coli* O157:H7 polyclonal antibody-modified (MWCNT/PEI)<sub>4</sub>MWCNT electrode (blue curve). The dot plots are real experiments results, while the line curves are fitting results using the inserted equivalent circuit, where  $R_s$  equals the resistance of solution,  $R_{et}$  is the charge transfer resistance,  $R_w$  represents Warburg resistance, and  $C_{dl}$  is double layer capacitance.

As shown in **Fig. S2a**, the  $[\text{Fe}(\text{CN})_6]^{3-/4-}$  redox probe exhibited a reversible behavior on the bare ITO electrode. The deposition of (MWCNT/PEI)<sub>4</sub>MWCNT multilayers onto ITO electrode resulted in the obvious increase in oxidation and reduction peak currents of  $[\text{Fe}(\text{CN})_6]^{3-/4-}$  probe. This increase can be explained in two reasons: (1) MWCNT has good conductivity, which facilitates electron transfer between the electrolyte and the ITO electrode; (2) The structure of MWCNT network in the multilayer film increase the electrochemically active area. After the nonconductive antibody layer attached to (MWCNT/PEI)<sub>4</sub>MWCNT multilayers through covalent bond, the antibody hampers the electron transfer of the redox probes, resulting in the decrease in peak current.

Electrochemical impedance spectroscopy (EIS) also confirmed the stepwise assembly of the bacterial biosensors. **Fig. S2b** illustrates the results of the Nyquist plot of the ITO electrode after each modification step. As shown in **Fig. S2b**, an

obvious semicircle was observed at high frequencies, corresponding to the electron transfer-limited process. A straight line with a slope close to unity appears at lower frequencies, resulting from the diffusion limiting of the redox species from the electrolyte to the electrode interface. The generated double layer capacitance ( $C_{dl}$ ) and the charge transfer resistance ( $R_{et}$ ) can be calculated from this spectrum using a simple equivalent circuit (the inset of **Fig. S2b**).<sup>1</sup> The  $R_{et}$  value of bare ITO electrode, (MWCNT/PEI)<sub>4</sub>MWCNT multilayers-coated ITO electrode, and the anti-*E. coli* O157:H7 polyclonal antibody-modified (MWCNT/PEI)<sub>4</sub>MWCNT electrode is about 75.12  $\Omega$ , 28.3 $\pm$ 1.7  $\Omega$  and 127.13 $\pm$ 3.12  $\Omega$ , respectively. This result demonstrates that the conductive CNT multilayers can dramatically enhance charge transfer of redox probes.

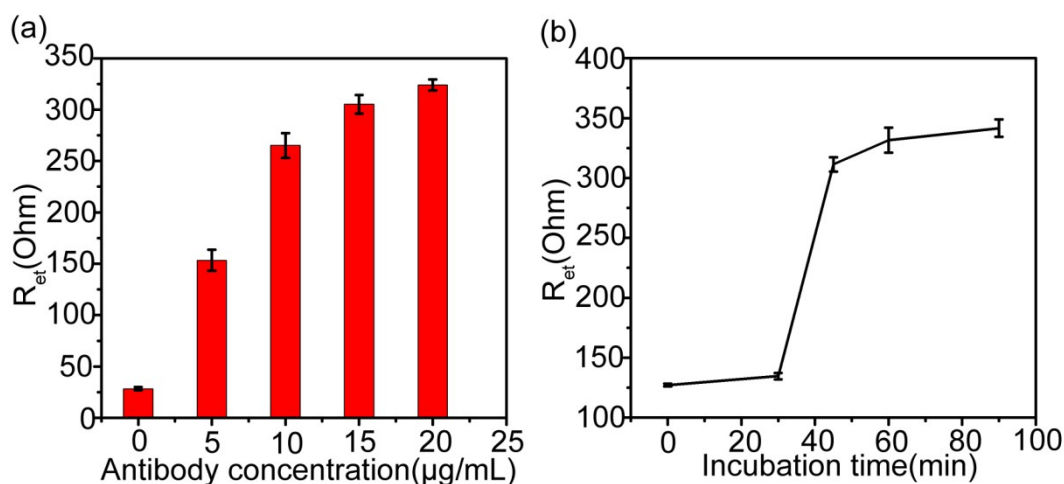

**Fig. S3** (a)  $R_{et}$  of (MWCNT/PEI)<sub>4</sub>MWCNT/antibody modified ITO electrodes as a function of the antibody concentration. (b)  $R_{et}$  of (MWCNT/PEI)<sub>4</sub>MWCNT/antibody modified ITO electrodes as a function of the incubation time. The error bars represent the standard deviation of at least three measurements.

The influence of incubation time and antibody concentration during the functionalization process on *E. coli* O157:H7 capture efficiency was evaluated with EIS. As shown in **Fig. S3a**, in the range of 0-10  $\mu\text{g mL}^{-1}$ , with the increasing of the concentration of antibody, an increase in the  $R_{et}$  value is observed due to the insulating properties of the bacteria attached on the electrode surface. Beyond a concentration of 10  $\mu\text{g mL}^{-1}$ , the  $R_{et}$  value increases slowly, indicating that the electrode surface reached a saturation point at higher concentration. Next, we investigated the effect of the incubation time of the capture efficiency of *E. coli* O157:H7. The prepared sensors are exposed to  $10^5$  CFU per mL *E. coli* O157:H7 solution for 30, 45, 60 and 90 min, respectively. As shown in **Fig. S3b**, the  $R_{et}$  value increased with the increase of incubation time and reached equilibrium when the incubation time was 45 min. Based on above results, a suitable concentration of anti-*E. coli* O157:H7 polyclonal antibody was found to be 10  $\mu\text{g mL}^{-1}$ . The optimal incubation time for the electrode was 45 min for the target capture.

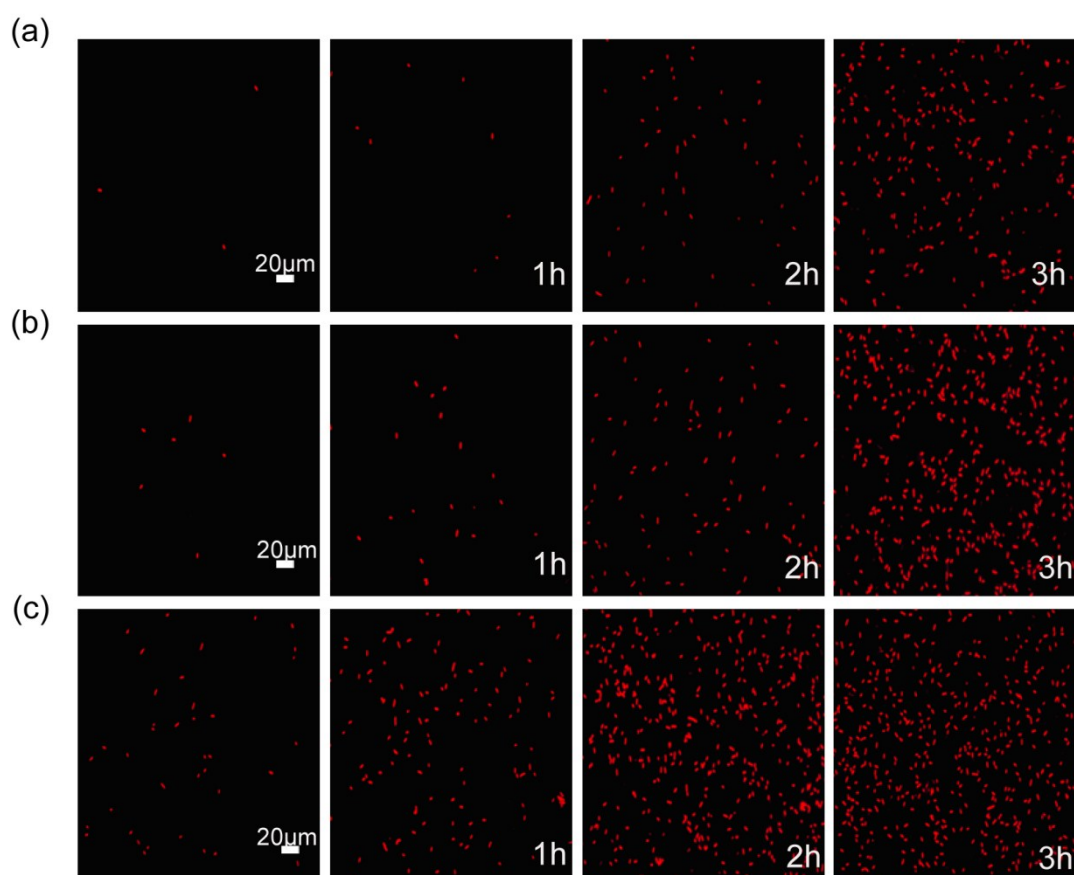

**Fig. S4** Fluorescent images of different concentration of *E. coli* O157:H7 captured by the biochip before and after culturing for 1 h, 2 h, and 3 h, respectively. (a) 5 CFU mL<sup>-1</sup>; (b) 10 CFU mL<sup>-1</sup>; (c) 100 CFU mL<sup>-1</sup>. Scale bars are 20 μm.

**Part S2 Analytic performance of the combination microfluidic chip-based LAMP coupled with CNT multilayer biosensor**

**Table S1** Comparison of the proposed method and other *E. coli* O157:H7 sensors.

| Detection<br>method                     | LOD                                    | Linear<br>range                                               | Reference  |
|-----------------------------------------|----------------------------------------|---------------------------------------------------------------|------------|
| Electrochemical<br>Detection            | $8.0 \times 10^2$ CFU mL <sup>-1</sup> | $1.0 \times 10^3$ - $1.0 \times 10^7$<br>CFU mL <sup>-1</sup> | 2          |
| Chemiluminescence                       | $10^3$ CFU mL <sup>-1</sup>            |                                                               | 3          |
| Chemiluminescence                       | $1.2 \times 10^3$ CFU mL <sup>-1</sup> | $4.3 \times 10^3$ - $4.3 \times 10^5$<br>CFU mL <sup>-1</sup> | 4          |
| An acoustophoresis<br>chip-based PCR    | $10^3$ CFU mL <sup>-1</sup>            |                                                               | 5          |
| Real-time PCR                           | $10^2$ CFU mL <sup>-1</sup>            |                                                               | 6          |
| microfluidic<br>immunosensor            | $10^2$ CFU mL <sup>-1</sup> .          |                                                               | 7          |
| Impedimetric<br>immunosensor            | 2 CFU mL <sup>-1</sup>                 | $30$ - $3 \times 10^4$ CFU mL <sup>-1</sup>                   | 8          |
| Impedimetric<br>immunosensor            | $1.5 \times 10^2$ CFU mL <sup>-1</sup> | $1.5 \times 10^2$ -<br>$1.5 \times 10^7$ CFU mL <sup>-1</sup> | 9          |
| Impedimetric<br>sensors                 | $10^3$ CFU mL <sup>-1</sup>            | $10^3$ - $10^7$ CFU mL <sup>-1</sup> .                        | 10         |
| Enzyme-linked<br>immunosorbent<br>assay | 68 CFU mL <sup>-1</sup>                | $6.8 \times 10^2$ -<br>$6.8 \times 10^3$ CFU mL <sup>-1</sup> | 11         |
| The proposed<br>method                  | 1 CFU mL <sup>-1</sup>                 | $1$ - $10^4$ CFU mL <sup>-1</sup>                             | this study |

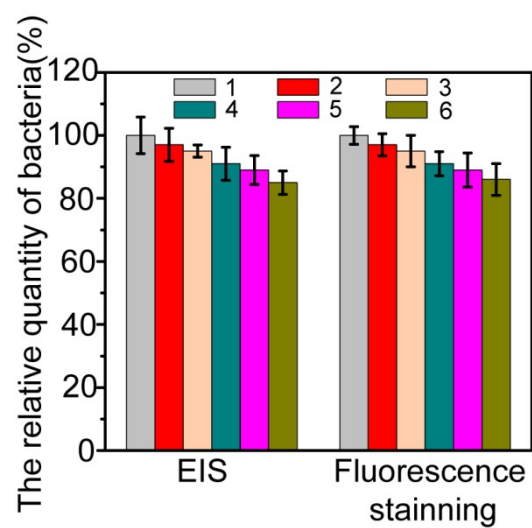

**Fig. S5** Regeneration of the CNT multilayer biosensor. The concentration of *E. coli* O157:H7 is 50 CFU mL<sup>-1</sup>.

## Reference

- 1 C. Fernández-Sánchez, C. J. McNeil and K. Rawson, *Trends Anal. Chem.*, 2005, **24**, 37-48.
- 2 L. Xu, J. Du, Y. Deng and N. He, *J. Biomed. Nanotechnol.*, 2012, **8**, 1006-1011.
- 3 Z. Li, L. He, N. He, Z. Shi, H. Wang, S. Li, H. Liu, X. Li, Y. Dai and Z. Wang, *J. Nanosci. Nanotechnol.*, 2010, **10**, 696-701.
- 4 Y. Zhang, C. Tan, R. Fei, X. Liu, Y. Zhou, J. Chen, H. Chen, R. Zhou and Y. Hu, *Anal. Chem.*, 2014, **86**, 1115-1122.
- 5 P. D. Ohlsson, M. Evander, K. Petersson, L. Mellhammar, A. Lehmusvuori, U. Karhunen, M. Soikkeli, T. Seppä, E. Tuunainen and A. Spangar, *Anal. Chem.*, 2016, **88**, 9403-9411.
- 6 Y. Liu and A. Mustapha, *Int. J. Food. Microbiol.*, 2014, **170**, 48-54.
- 7 F. Tan, P. H. Leung, Z.-b. Liu, Y. Zhang, L. Xiao, W. Ye, X. Zhang, L. Yi and M. Yang, *Sens. Actuators. B-Chem.*, 2011, **159**, 328-335.
- 8 M. B. dos Santos, J. Aguil, B. Prieto-Simón, C. Sporer, V. Teixeira and J. Samitier, *Biosens. Bioelectron.*, 2013, **45**, 174-180.
- 9 Y. Wang, J. Ping, Z. Ye, J. Wu and Y. Ying, *Biosens. Bioelectron.*, 2013, **49**, 492-498.
- 10 Y. Li, R. Afrasiabi, F. Fathi, N. Wang, C. Xiang, R. Love, Z. She and H.-B. Kraatz, *Biosens. Bioelectron.*, 2014, **58**, 193-199.
- 11 Z. Shen, N. Hou, M. Jin, Z. Qiu, J. Wang, B. Zhang, X. Wang, J. Wang, D. Zhou and J. Li, *Gut. Pathog.*, 2014, **6**, 14.
